# Supplementary material
Source: PubMed Central journal article supplement (PMC9179934)
Supplement: NIHMS1779337-supplement-Supplemental_Material.pdf [file NIHMS1779337-supplement-Supplemental_Material.pdf]

# **SUPPLEMENTAL MATERIAL**

Tables S1-S3

Table S1. Multivariable-adjusted associations of the cardiovascular health score with incident AVC: Stratified by race/ethnicity.

|              | White                         | Chinese-American                     | Black                                | Hispanic                             |
|--------------|-------------------------------|--------------------------------------|--------------------------------------|--------------------------------------|
| Incident AVC | Incidence rate ratio (95% CI) |                                      |                                      |                                      |
| Inadequate   | Reference                     | Reference                            | Reference                            | Reference                            |
| Average      | 0.73 (0.46, 1.19)             | 0.74 (0.26, 2.12)                    | <b>0.41 (0.19, 0.86)<sup>‡</sup></b> | <b>0.23 (0.09, 0.57)<sup>†</sup></b> |
| Optimal      | 0.59 (0.33, 1.07)             | <b>0.00 (0.00, 0.00)<sup>*</sup></b> | 0.61 (0.24, 1.53)                    | <b>0.21 (0.05, 0.94)<sup>‡</sup></b> |

Abbreviations: AVC, aortic valve calcification; CI, confidence interval.

Cardiovascular health score ranged from 0-14 points: inadequate score, 0-8; average, 9-10; optimal, 11-14.

Incidence rate ratio was derived from Poisson regression models with robust variance estimation.

Incident ECC was defined as Agatston score >0 at exam 2/3 among participants with Agatston score =0 at baseline.

Model was adjusted for age, sex, education, income, health insurance, field center and time between scans.

Statistically significant results are in bold font. \*P <0.001; †P <0.01; ‡P <0.05.

Sample size for incident ECC = 5,520.

Table S2. Multivariable-adjusted associations of the cardiovascular health score with AVC/DTAC extent and progression: Stratified by race/ethnicity.

|                        | White                             | Chinese-American                  | Black                            | Hispanic                          |
|------------------------|-----------------------------------|-----------------------------------|----------------------------------|-----------------------------------|
| Extent at baseline     | Percent difference (95% CI)       |                                   |                                  |                                   |
|                        | AVC                               |                                   |                                  |                                   |
| Inadequate             | Reference                         | Reference                         | Reference                        | Reference                         |
| Average                | <b>-22 (-32, -10)<sup>†</sup></b> | -16 (-32, 3)                      | -9 (-21, 4)                      | -5 (-20, 13)                      |
| Optimal                | <b>-32 (-41, -21)<sup>*</sup></b> | <b>-29 (-41, -15)<sup>†</sup></b> | <b>-17 (-29, -2)<sup>‡</sup></b> | -11 (-29, 10)                     |
|                        | DTAC                              |                                   |                                  |                                   |
| Inadequate             | Reference                         | Reference                         | Reference                        | Reference                         |
| Average                | <b>-32 (-45, -16)<sup>†</sup></b> | -27 (-52, 10)                     | -8 (-26, 13)                     | <b>-32 (-47, -14)<sup>†</sup></b> |
| Optimal                | <b>-51 (-61, -40)<sup>*</sup></b> | <b>-45 (-63, -16)<sup>†</sup></b> | <b>-25 (-41, -3)<sup>‡</sup></b> | <b>-26 (-45, 0)<sup>‡</sup></b>   |
| Progression at 2 years | Percent change (95% CI)           |                                   |                                  |                                   |
|                        | AVC                               |                                   |                                  |                                   |
| Inadequate             | Reference                         | Reference                         | Reference                        | Reference                         |
| Average                | 6 (-2, 13)                        | 0 (-11, 13)                       | <b>-7 (-13, -1)<sup>‡</sup></b>  | <b>-10 (-17, -2)<sup>‡</sup></b>  |
| Optimal                | 2 (-5, 10)                        | -5 (-14, 6)                       | -7 (-14, 1)                      | <b>-8 (-14, -1)<sup>‡</sup></b>   |
|                        | DTAC                              |                                   |                                  |                                   |
| Inadequate             | Reference                         | Reference                         | Reference                        | Reference                         |
| Average                | <b>-10 (-19, 0)<sup>‡</sup></b>   | -11 (-28, 9)                      | 0 (-10, 12)                      | <b>-15 (-25, -3)<sup>‡</sup></b>  |
| Optimal                | <b>-19 (-27, -11)<sup>*</sup></b> | -11 (-28, 9)                      | <b>-14 (-24, -3)<sup>‡</sup></b> | <b>-26 (-33, -17)<sup>*</sup></b> |

Abbreviations: AVC, aortic valve calcification; CI, confidence interval; DTAC, descending thoracic aorta calcification.

Cardiovascular health score ranged from 0-14 points: inadequate score, 0-8; average, 9-10; optimal, 11-14.

ECC was expressed as natural log transformed (ECC + 1).

Percent difference and percent change were calculated from  $[\text{Exp}(\beta) - 1] * 100$ , derived from linear mixed-effects regression models.

Model was adjusted for age, sex, education, income, health insurance and field center.

Statistically significant results are in bold font. \*P <0.001; †P <0.01; ‡P <0.05.

Table S3. Multivariable-adjusted associations of the cardiovascular health score with AVC extent and progression: Stratified by sex.

|                        | Men                               | Women                             |
|------------------------|-----------------------------------|-----------------------------------|
| Extent at baseline     | Percent difference (95% CI)       |                                   |
| Inadequate             | Reference                         | Reference                         |
| Average                | <b>-15 (-25, -3)<sup>‡</sup></b>  | <b>-13 (-21, -5)<sup>†</sup></b>  |
| Optimal                | <b>-31 (-40, -20)<sup>*</sup></b> | <b>-19 (-26, -11)<sup>*</sup></b> |
| Progression at 2 years | Percent change (95% CI)           |                                   |
| Inadequate             | Reference                         | Reference                         |
| Average                | -2 (-8, 4)                        | -2 (-7, 3)                        |
| Optimal                | -5 (-11, 2)                       | -3 (-8, 2)                        |

Abbreviations: AVC, aortic valve calcification; CI, confidence interval.

Cardiovascular health score ranged from 0-14 points: inadequate score, 0-8; average, 9-10; optimal, 11-14.

ECC was expressed as natural log transformed (ECC + 1).

Percent difference and percent change were calculated from  $[\text{Exp}(\beta) - 1] * 100$ , derived from linear mixed-effects regression models.

Model was adjusted for age, race/ethnicity, education, income, health insurance and field center.

Statistically significant results are in bold font. \*P <0.001; †P <0.01; ‡P <0.05.
